# Supplementary material
Source: PubMed Central journal article supplement (PMC5812943)
Supplement: AEM.02109-17_zam005188345s1.pdf [file AEM.02109-17_zam005188345s1.pdf]

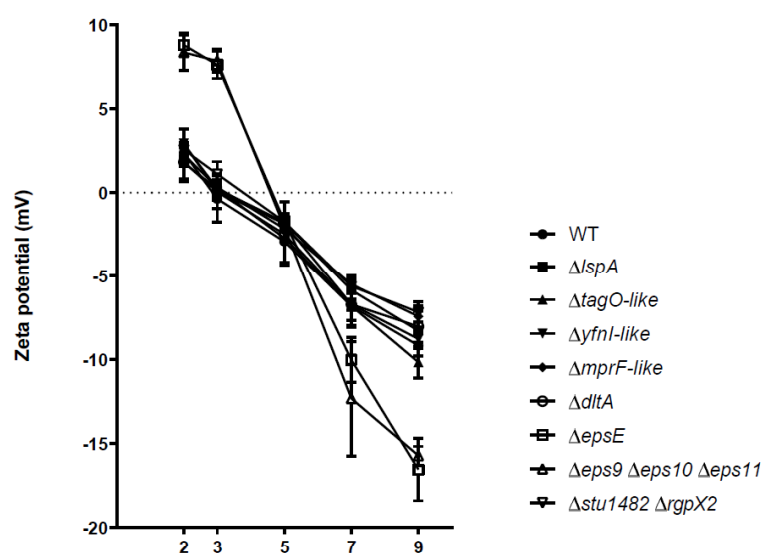

**FIG S1** Zeta potential values of LMG 18311 and mutants at pH 2, 3, 5, 7 and 9.

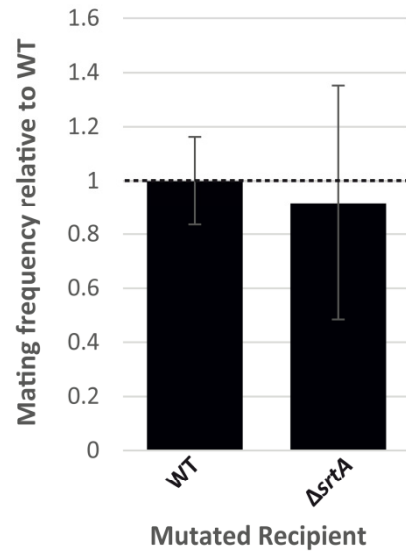

**FIG S2** Conjugative transfer of *ICES<sub>St3</sub>* using recipient cells mutated in sortase A gene. Conjugation frequency value of LMD-9  $\Delta srtA$  relative to WT (LMD-9(pMG36e)). Means and standard deviation result from at least 3 biological repetitions.

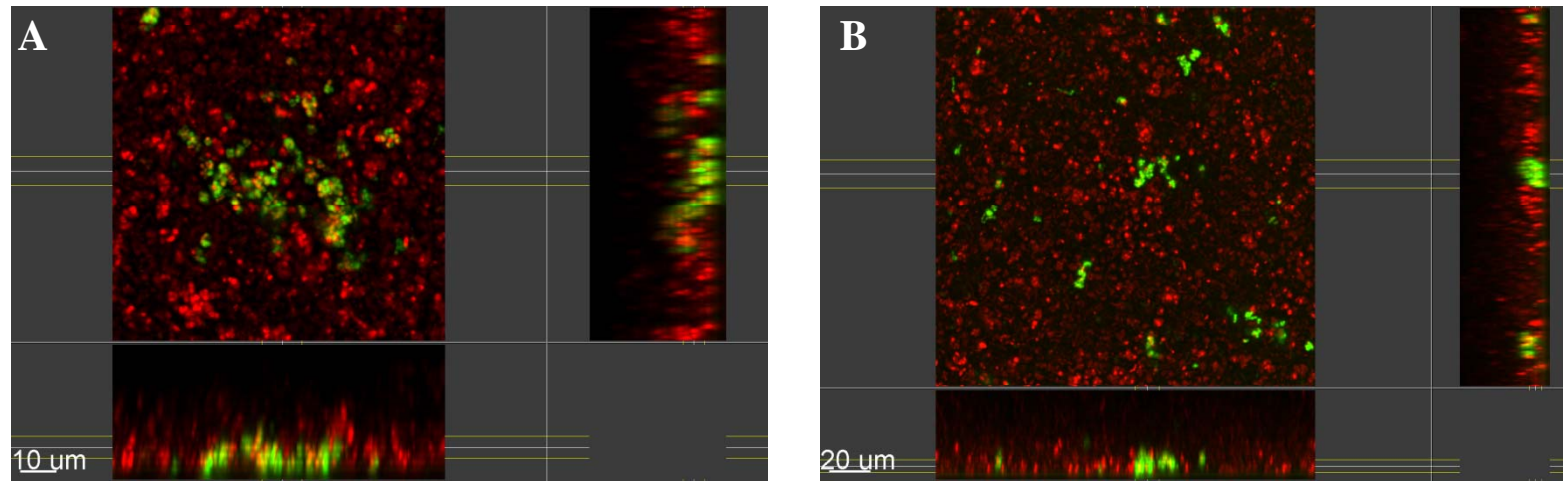

**FIG S3** Co-aggregation of the mutated recipient cells ( $\Delta tagO$ -like) with the WT donor cells  
Analysis of the co-aggregation of the mutated recipient cells ( $\Delta tagO$ -like) with the WT donor cells (panel A) by laser scanning confocal microscopy. Control (panel B) shows the mix between WT donor and recipient cells.  
Cells carrying *gfp*-labeled ICES*t3* appear as green fluorescent cells. Cells were counterlabeled using the syto61 red fluorescent nucleic acid stain.
